# Supplementary material for: T Cell-Association of Carboxy-Terminal Dendrimers with Different Bound Numbers of Phenylalanine and Their Application to Drug Delivery
Source: MDPI journal article supplement (doi:10.3390/pharmaceutics15030888), 2023-03-09
Supplement: s1 [file s1]

## Supplementary Information

# T Cell-Association of Carboxy-Terminal Dendrimers with Different Bound Numbers of Phenylalanine and Their Application to Drug Delivery

Hiroya Shiba <sup>1</sup>, Tomoka Hirose <sup>1</sup>, Yunshen Fu <sup>1</sup>, Masataka Michigami <sup>2</sup>, Ikuo Fujii <sup>2</sup>, Ikuhiko Nakase <sup>2</sup>, Akikazu Matsumoto <sup>1</sup> and Chie Kojima <sup>1,\*</sup>

Table S1. Reaction ratios to synthesize various PAMAM-Phe-CHex dendrimers

| Dendrimer <sup>1</sup>        | Phe     |       |
|-------------------------------|---------|-------|
|                               | in Feed | Bound |
| PAMAM-CHex-Phe64 <sup>2</sup> | 142     | 64    |
| PAMAM-CHex-Phe48              | 55      | 48    |
| PAMAM-CHex-Phe37              | 45      | 37    |
| PAMAM-CHex-Phe27              | 37      | 27    |

<sup>1</sup> The number of terminal groups of the dendrimer is 64.

<sup>2</sup> Referred to our previous report: Shiba, H. et al. J. Mater. Chem. B. 2022, 10, 2463.

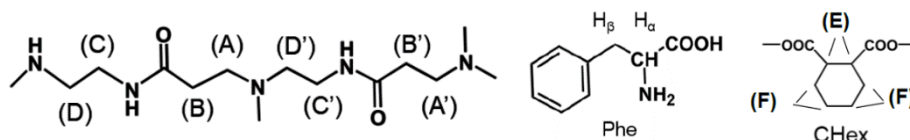

Figure S1 Partial dendrimer structure for assignment for of the following <sup>1</sup>H NMR spectra.

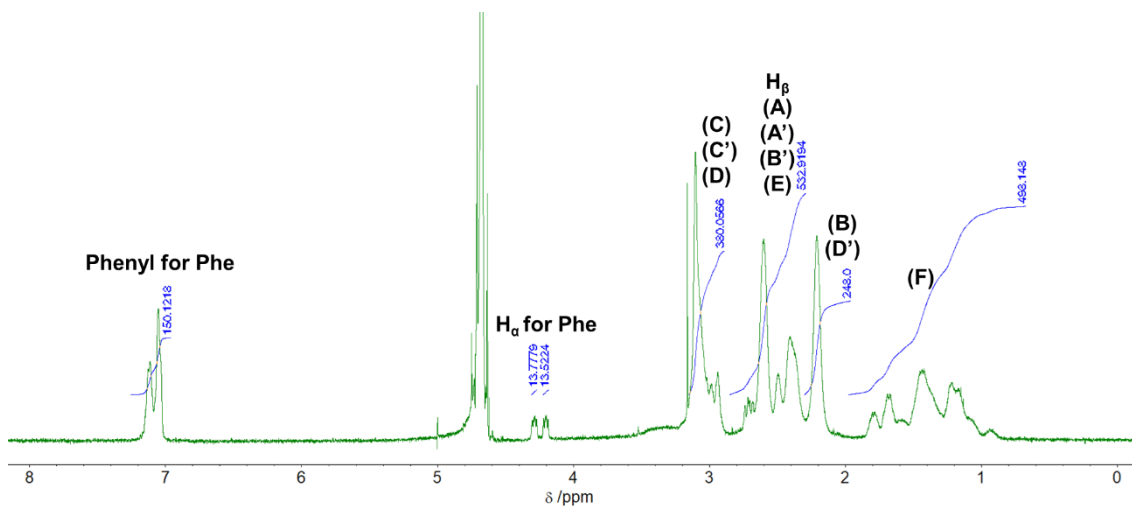

Figure S2.  $^1\text{H}$  NMR spectrum of PAMAM-CHex-Phe27 in  $\text{D}_2\text{O}$  containing NaOD.

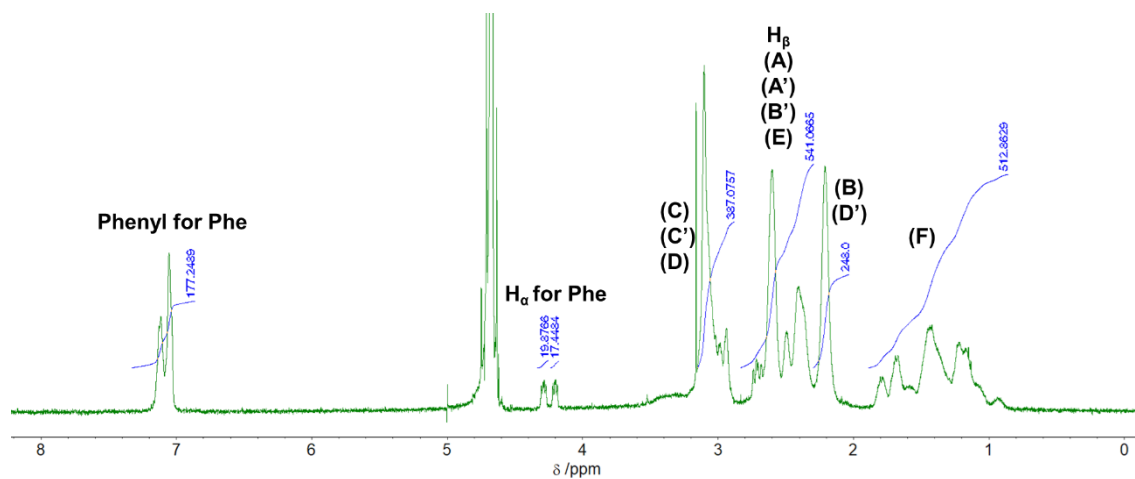

Figure S3.  $^1\text{H}$  NMR spectrum of PAMAM-CHex-Phe37 in  $\text{D}_2\text{O}$  containing NaOD.

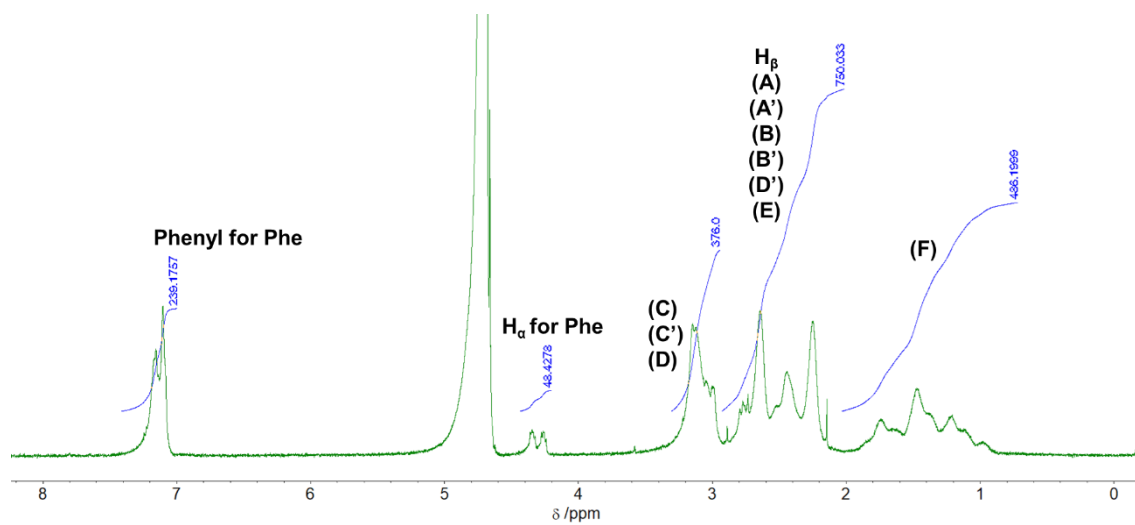

Figure S4.  $^1\text{H}$  NMR spectrum of PAMAM-CHex-Phe48 in  $\text{D}_2\text{O}$  containing NaOD.
